# Supplementary material
Source: PubMed Central journal article supplement (PMC3307310)

### **Supplemental Figure Legends**

Suppl. Fig. 1. Specificity of 5-HT1A immunostaining. HEK293 were transiently transfected with pFlag-CMV2 or pFlag-mouse 5-HT1A. Cells were fixed 20min in 4% paraformaldehyde 36h post-transfection, blocked and incubated overnight with our rabbit anti-5-HT1A-i2 serum. Slides were washed 3 times and incubated with a goat anti-rabbit secondary antibody.

Suppl. Fig. 2. Colocalization of 5-HT and 5-HT1A receptor in dorsal raphe cells. Consecutive sections of dorsal raphe nuclei (DRN) of wild-type mice were stained for 5-HT and 5-HT1A receptor, showing co-localization. 20X magnification was used, with scale bar = 100  $\mu$ m (n=3).

**Suppl. Fig. 1**

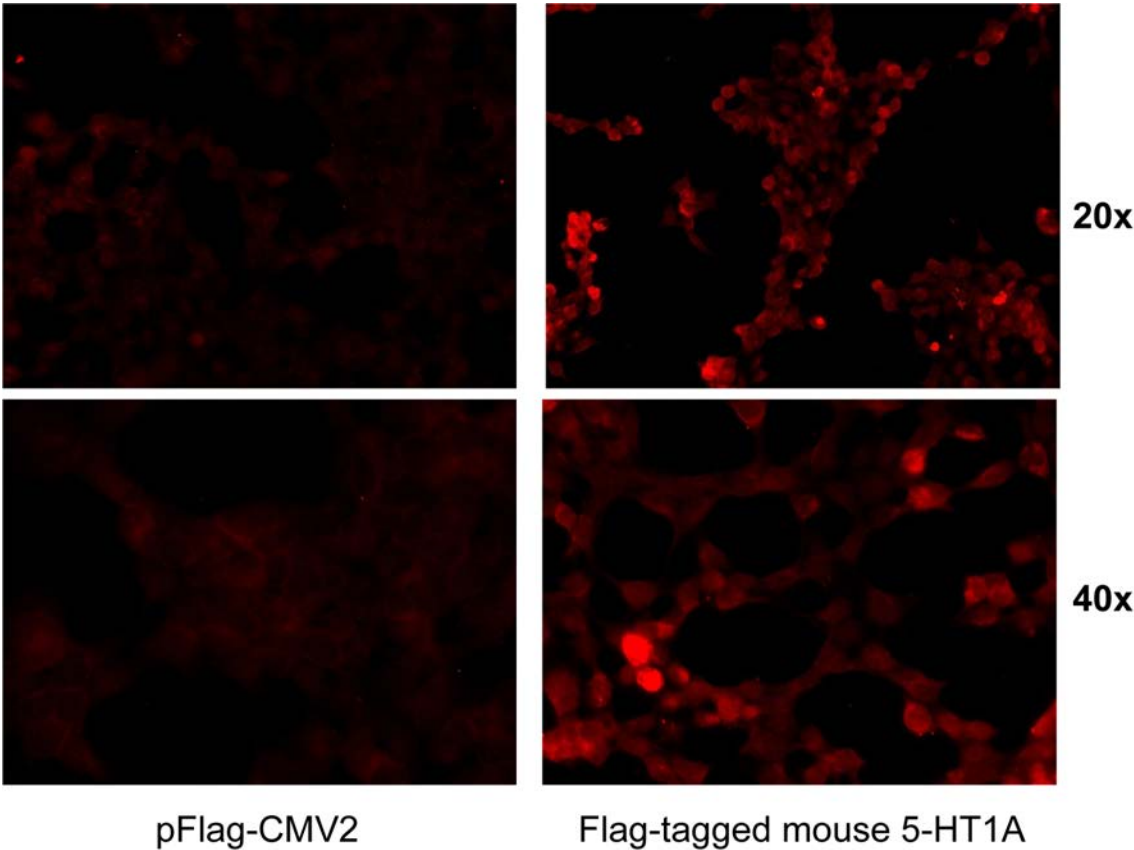

## Suppl. Fig. 2

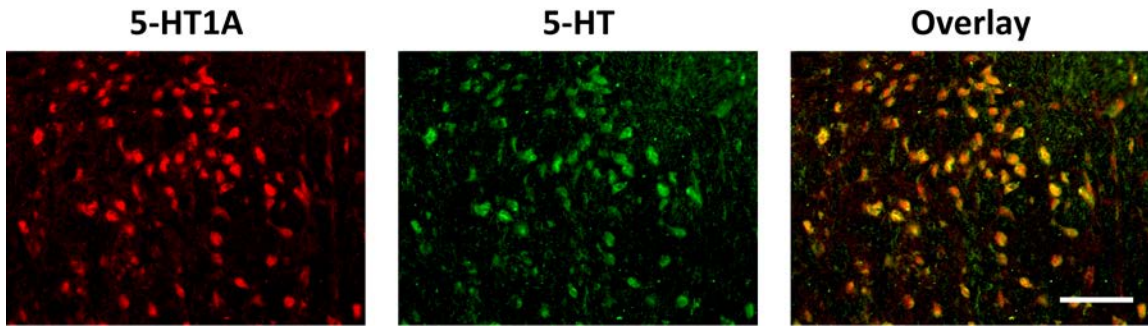

Supplement: supp_M111.293027_jbc.M111.293027-1.pdf [file supp_M111.293027_jbc.M111.293027-1.pdf]
